# Supplementary material
Source: Springer Nature journal article supplement (https://www.springermedizin.de/resource/supplementary/12889_2010_2899_MOESM3_ESM.pdf/9487608)

4 Schools

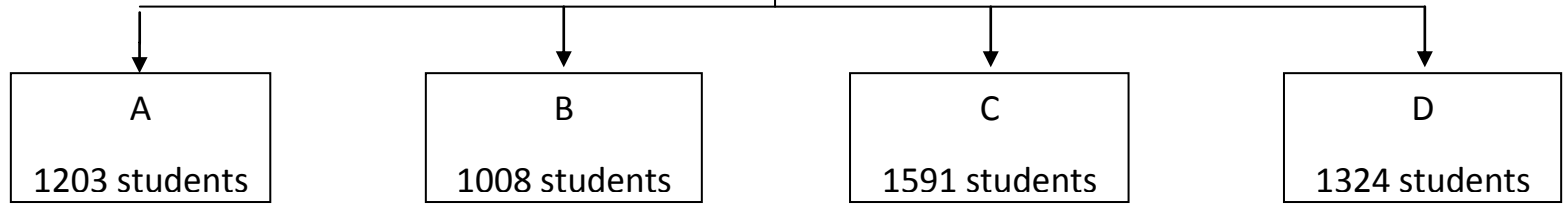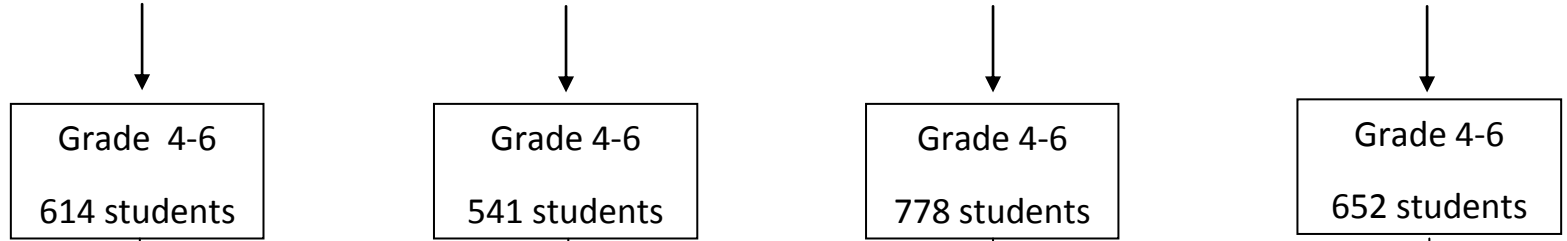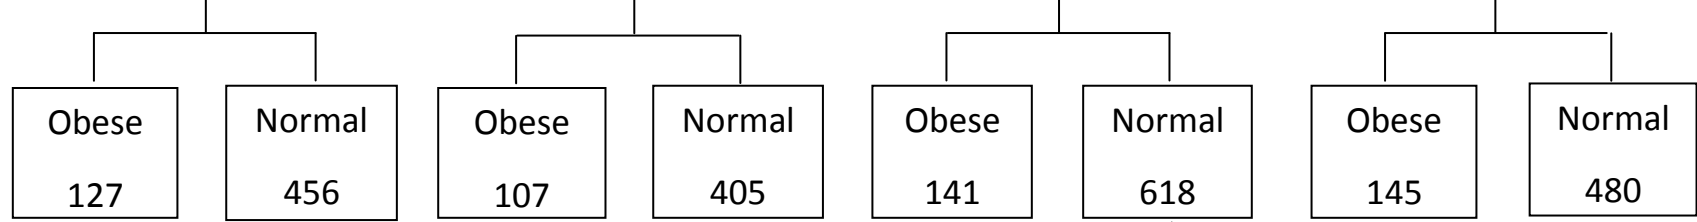

Simple random sampling

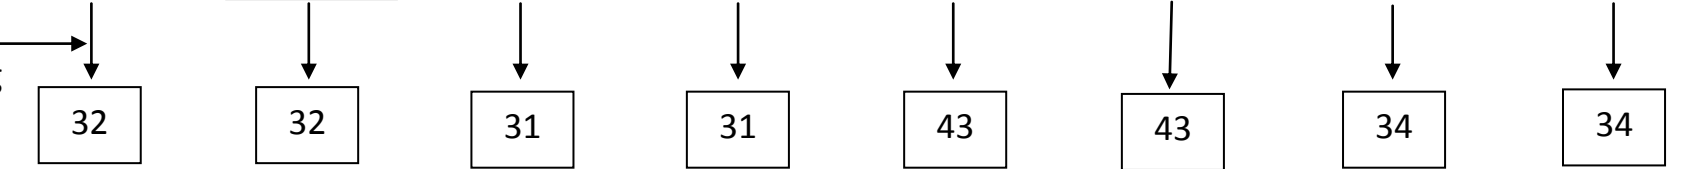

Supplement: MOESM3 [file 9487608]
